# Supplementary material
Source: Springer Nature journal article supplement (https://www.springerprofessional.de/resource/supplementary/13638_2010_122_MOESM12_ESM.pdf/11897092)
Supplement: MOESM12 [file 11897092]

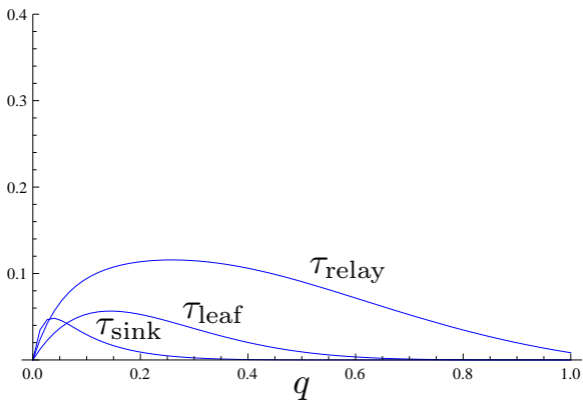

(a) Configuration A: 7 leaves at each of the 2 relays ( $N_1 = 7, N_2 = 2$ ).

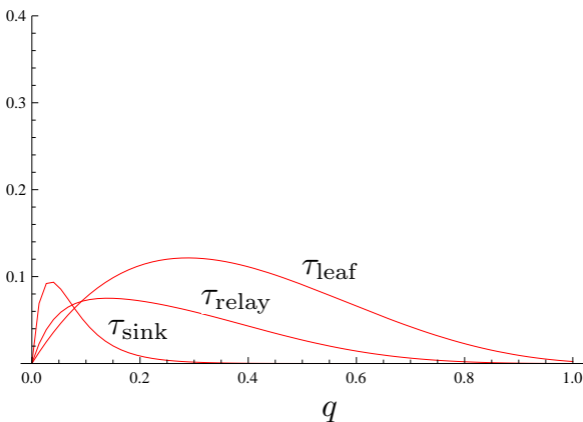

(b) Configuration B: 3 leaves at each of the 4 relays ( $N_1 = 3, N_2 = 4$ ).

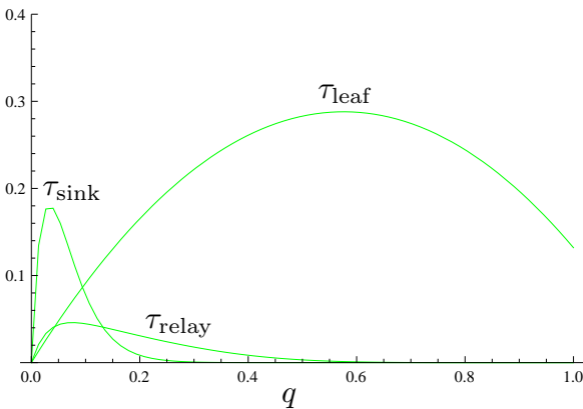

(c) Configuration C: 1 leaf at each of the 8 relays ( $N_1 = 1, N_2 = 8$ ).
